1 **A new duck genome reveals conserved and convergently evolved chromosome architectures**  
2 **of birds and mammals**

3

4 Jing Li<sup>1</sup>, Jilin Zhang<sup>2</sup>, Jing Liu<sup>1,3</sup>, Yang Zhou<sup>4</sup>, Cheng Cai<sup>1</sup>, Luohao Xu<sup>1,3</sup>, Xuelei Dai<sup>5</sup>,  
5 Shaohong Feng<sup>4</sup>, Chunxue Guo<sup>4</sup>, Jinpeng Rao<sup>6</sup>, Kai Wei<sup>6</sup>, Erich D. Jarvis<sup>7,8</sup>, Yu Jiang<sup>5</sup>,  
6 Zhengkui Zhou<sup>9</sup>, Guojie Zhang<sup>10,11,12,13</sup>, Qi Zhou<sup>1,3,6,†</sup>

7

8 1. MOE Laboratory of Biosystems Homeostasis & Protection, Life Sciences Institute, Zhejiang  
9 University, Hangzhou 310058, China

10 2. Department of Medical Biochemistry and Biophysics, Karolinska Institute, Stockholm 17177,  
11 Sweden

12 3. Department of Neuroscience and Developmental Biology, University of Vienna, Vienna  
13 1090, Austria

14 4. BGI-Shenzhen, Beishan Industrial Zone, Shenzhen 518083, China

15 5. Key Laboratory of Animal Genetics, Breeding and Reproduction of Shaanxi Province, College  
16 of Animal Science and Technology, Northwest A&F University, Yangling 712100, China

17 6. Center for Reproductive Medicine, The 2nd Affiliated Hospital, School of Medicine,  
18 Hangzhou 310052, Zhejiang University

19 7. Laboratory of Neurogenetics of Language, The Rockefeller University, New York 10065,  
20 USA

21 8. Howard Hughes Medical Institute, Chevy Chase, Maryland 20815, USA.

22 9. Institute of Animal Science, Chinese Academy of Agricultural Sciences, Beijing, China

23 10. China National GeneBank, BGI-Shenzhen, Jinsha Road, Shenzhen, 518120, China

24 11. State Key Laboratory of Genetic Resources and Evolution, Kunming Institute of Zoology,  
25 Chinese Academy of Sciences, Kunming 650223, China

26 12. Section for Ecology and Evolution, Department of Biology, University of Copenhagen, DK-  
27 2100 Copenhagen, Denmark

28 13. Center for Excellence in Animal Evolution and Genetics, Chinese Academy of Sciences,  
29 Kunming 650223, China

30

31 †Corresponding author. Email: [zhouqi1982@zju.edu.cn](mailto:zhouqi1982@zju.edu.cn)

32 **Abstract**

33 **Background:**

34 Ducks have a typical avian karyotype that consists of macro- and microchromosomes, but a pair  
35 of much less differentiated ZW sex chromosomes compared to chicken. To elucidate the  
36 evolution of chromosome architectures between duck and chicken, and between birds and  
37 mammals, we produced a nearly complete chromosomal assembly of a female Pekin duck by  
38 combining long-read sequencing and multiplatform scaffolding techniques.

39 **Results:**

40 The major improvement of genome assembly and annotation quality resulted from successful  
41 resolution of lineage-specific propagated repeats that fragmented the previous Illumina-based  
42 assembly. We found that the duck topologically associated domains (TAD) are demarcated by  
43 putative binding sites of the insulator protein CTCF, housekeeping genes, or transitions of  
44 active/inactive chromatin compartments, indicating the conserved mechanisms of spatial  
45 chromosome folding with mammals. There are extensive overlaps of TAD boundaries between  
46 duck and chicken, and also between the TAD boundaries and chromosome inversion  
47 breakpoints. This suggests strong natural selection on maintaining regulatory domain integrity,  
48 or vulnerability of TAD boundaries to DNA double-strand breaks. The duck W chromosome  
49 retains 2.5-fold more genes relative to chicken. Similar to the independently evolved human Y  
50 chromosome, the duck W evolved massive dispersed palindromic structures, and a pattern of  
51 sequence divergence with the Z chromosome that reflects stepwise suppression of homologous  
52 recombination.

53 **Conclusions:**

54 Our results provide novel insights into the conserved and convergently evolved chromosome  
55 features of birds and mammals, and also importantly add to the genomic resources for poultry  
56 studies.

57

58 **Keywords:** Duck genome, chromosome inversion, topologically associated domain, sex  
59 chromosomes

## 60 **Background**

61 Birds have the largest species number and some of the smallest genome sizes among terrestrial  
62 vertebrates. This has attracted extensive efforts since the era of cytogenetics into elucidating the  
63 diversity of their ‘streamlined’ genomes that give rise to the tremendous phenotypic diversity[1].  
64 The karyotype of birds exhibits two major distinctions from that of mammals: first, it comprises  
65 about 10 pairs of large to medium sized chromosomes (macrochromosomes) and about 30 pairs  
66 of much smaller sized chromosomes (microchromosomes)[2]. During the over 100 million years  
67 (MY) of avian evolution, there were few interchromosomal rearrangements among most  
68 species[3-5] except for falcons and parrots (Falconiformes and Psittaciformes)[6-9]. Among the  
69 published karyotypes of over 800 bird species, the majority of them have a similar chromosome  
70 number around  $2n=80$ [10]. These results indicate that the chromosome evolution of birds is  
71 dominated by intrachromosomal rearrangements. Genomic comparisons between chicken,  
72 turkey, flycatcher and zebra finch[11, 12] found that birds, similar to mammals[13, 14], have  
73 fragile genomic regions that were recurrently used for mediating intrachromosomal  
74 rearrangements, and these regions seem to be associated with high recombination rates[15] and  
75 low densities of conserved non-coding elements (CNEs)[5]. However, compared to  
76 mammals[13, 14, 16], much less is known about the interspecific diversity within avian  
77 chromosomes, particularly microchromosomes (but see[5, 12]) at the sequence level, due to the  
78 scarcity of chromosome-level bird genomes.

79 The other major distinction between the mammalian and avian karyotypes is their sex  
80 chromosomes. Birds have a pair of female heterogametic (male ZZ, female ZW) sex  
81 chromosomes that originated from a different pair of ancestral autosomes than the eutherian  
82 XY[17, 18]. Since their divergence about 300 MY ago, sex chromosomes of birds and mammals  
83 have undergone independent stepwise suppression of homologous recombination, and produced  
84 a punctuated pattern of pairwise sequence divergence levels between the neighboring regions  
85 termed ‘evolutionary strata’[19-21]. Despite the consequential massive gene loss, both chicken

86 W chromosome (chrW) and eutherian chrYs have been found to preferentially retain dosage-  
87 sensitive genes or genes with important regulatory functions[22]. In addition, the human chrY  
88 has evolved palindromic sequences that may facilitate gene conversions between the Y-linked  
89 gene copies[23], as an evolutionary strategy to limit the functional degeneration under the non-  
90 recombining environment[24]. Interestingly, such palindromic structures have also been reported  
91 on sex chromosomes of New World sparrows and blackbirds[25], and more recently in a plant  
92 species, the willow[26], suggesting it is a general feature of evolving sex chromosomes. Both  
93 cytogenetic work and Illumina-based genome assemblies of tens of bird species suggested that  
94 bird sex chromosomes comprise an unexpected interspecific diversity regarding both their  
95 lengths of recombining regions (pseudoautosomal regions, PAR), and their rates of gene loss[20,  
96 27]. For example, PARs cover over two thirds of the length of ratite (e.g., emu and ostrich) sex  
97 chromosomes[28], but are concentrated at the tips of the chicken and eutherian sex  
98 chromosomes. However, so far only the chicken chrW has been well-assembled using the  
99 laborious iterative clone-based sequencing method[22], and the majority of genomic sequencing  
100 projects tend to choose a male bird to avoid the repetitive chrW. This has hampered our broad  
101 and deep understanding of the composition and evolution of avian sex chromosomes.

102 The Vertebrate Genomes Project (VGP) has taken advantage of the development of long-read  
103 (PacBio or Nanopore) sequencing, linked-read (10X) and high-throughput chromatin  
104 conformation capture (Hi-C) technologies to empower rapid and accurate assembly of  
105 chromosome-level genomes including the sex chromosomes, in the absence of physical  
106 maps[29]. Further, Hi-C can uncover the three-dimensional (3D) architecture of chromosomes  
107 that is segregated in active (A) and inactive (B) chromatin compartments[30], and to a finer  
108 genomic scale, topologically associated domains (TADs) as the replication and regulatory  
109 units[31]. To elucidate the evolution of avian chromosome architectures in terms of sequence  
110 composition, genomic rearrangement and 3D chromatin structure, here we utilized a modified  
111 VGP pipeline to produce a nearly complete reference genome of a female Pekin duck (*Anas*

112 *platyrhynchos*, Z2 strain) with all the cutting-edge technologies mentioned above. We  
113 corroborated our reference genome through comparisons to previously published radiation  
114 hybrid (RH)[32] and fluorescence *in situ* hybridization (FISH)[33] linkage maps. We chose duck  
115 because first, as a representative species of *Anseriformes*, it diverged from *Galliformes* about  
116 72.5 MY ago[34], providing a deep but still trackable evolutionary distance for addressing the  
117 functional consequences of genomic rearrangements on chromatin domains. Second, the duck  
118 sex chromosomes have diverged to a degree between the highly heteromorphic sex chromosomes  
119 of chicken and homomorphic sex chromosomes of emu[20, 27]. The gradient of sex  
120 chromosome divergence levels exhibited by the three bird species together constitute a  
121 chronological order for a comprehensive understanding of the entire avian sex chromosome  
122 evolution process. Finally, besides being frequently used for basic evolutionary and  
123 developmental studies[35], the duck is another key poultry species, as well as a natural reservoir  
124 of all influenza A viruses[36]. Our new duck genome has anchored over 95% of the assembled  
125 sequences onto chromosomes, with great improvements in the non-coding regions and chrW  
126 sequences. We believe it will serve an important genomic resource for future studies into the  
127 mechanisms and application of artificial selection.

128

## 129 **Data Description**

130 Pekin duck (called duck from here on) has a haploid genome size estimated to be 1.41 Gb[37,  
131 38], and a karyotype of 9 pairs of macrochromosomes (from chr1 to chr8, chrZ/chrW) and 31  
132 pairs of microchromosomes (chr9 to chr39)[39]. The Illumina-based genome assembly of the  
133 duck (BG11.0) was produced over seven years ago and has 25.9% of the assembled genome  
134 assigned to chromosomes, containing 3.17% of bases as gaps[36]. To *de novo* assemble the new  
135 genome, we generated 143-X genome coverage of PacBio long reads (read N50 14.3 kb from  
136 115 SMRT cells, **Supplementary Fig. S1**), and 142-X genome coverage of 10x linked-read data  
137 from a female individual, 56-X genome coverage of BioNano map and 82-X genome coverage

138 of Hi-C reads from two different male individuals of the same inbred duck strain (**Figure 1**,  
139 **Supplementary Table S1**), and assembled the genome with a modified VGP pipeline[29]. To  
140 identify the female-specific chrW sequences, we also generated 72-X genome coverage Illumina  
141 reads from a male individual of the same duck strain to compare to the previously published  
142 female reads (SRA accession number: PRJNA636121). Our primary assembly of PacBio long  
143 reads assembles the entire genome into 1,645 gapless contigs (**Supplementary Table S2**),  
144 resulting in a 14-fold reduction of contig number (1,645 vs. 227,448) and 212-fold improvement  
145 of contig continuity measured by N50 (5.5Mb vs. 26.1Kb) compared to the BGI1.0 genome  
146 (**Table 1**). To scaffold the contigs, we first corrected their sequence errors with 92-X genome  
147 coverage female Illumina reads, then oriented and scaffolded them into 942 scaffolds with 10X  
148 linked-reads, BioNano optical maps and Hi-C reads (see **Methods**). As Hi-C data provides  
149 linkage but not orientation information, in our final step of chromosome anchoring, we  
150 incorporated an RH linkage map [32] and reduced the scaffold number further down to 755. We  
151 however detected 69 cases of conflicts of orientation between the RH map and the Hi-C  
152 scaffolds, manifested as inversions. By carefully examining the presence/absence of raw PacBio  
153 reads, Illumina mate-pairs, and syntenic chicken/goose sequences[40, 41] spanning the  
154 breakpoints of such inversions, the majority (54 of 69) supported the Hi-C map. And we have  
155 corrected a total of 15 orientation errors within the scaffolds (**Supplementary Fig. S2**).

156

## 157 **Analysis**

### 158 **A much improved female duck genome**

159 The final polished assembly (ZJU1.0) by Illumina reads exhibits a 62-fold improvement of  
160 scaffold continuity (N50 76.3Mb vs. 1.2Mb) compared to the Illumina genome, and is  
161 completely consistent with the FISH linkage map previously generated from 155 BAC clones  
162 (**Supplementary Fig. S2**)[33, 42]. The entire chrZ exhibits uniformly a 2-fold elevation of  
163 Illumina DNA sequencing read coverage in male relative to female, except for the chromosome



164 tip of pseudoautosomal regions (PAR) (see below), confirming that we assembled the Z  
165 chromosome and that it does not have chimeric sequences with chrW or the autosomes. This new  
166 genome has 95.6% (1.13 Gb) of the assembled sequences assigned to 31 autosomes and the ZW  
167 sex chromosomes (**Supplementary Table S3**). The remaining 4.4% (62.1 Mb) of the genome  
168 not anchored or about 200Mb unassembled sequences based on the estimated genome size is  
169 likely due to their repetitive sequence composition or lack of linkage markers. In particular, the  
170 assembled macrochromosomes have become much more continuous (**Figure 1b-c**), and we have  
171 assembled majorities of microchromosomes that were all unmapped in the BGI1.0 genome  
172 (**Figure 2a**).

173 The ZJU1.0 genome assembly also has a higher level of completeness measured by its almost  
174 gapless sequence composition (0.37% vs. 3.17%), and substantial numbers of annotated  
175 telomeric and centromeric regions (**Figure 2a, Supplementary Table S4-5**), compared to the  
176 BGI1.0 assembly. We filled in a total of 116.2 Mb sequences of gaps within or between the  
177 BGI1.0 scaffolds, which were enriched for repetitive elements and GC-rich sequences  
178 (**Supplementary Fig. S3-4**). This can be explained by the inability of Illumina reads to span or  
179 resolve the repeat regions with high copy numbers or complex structures, and the sequencing  
180 bias against the GC-rich regions[43-45]. Indeed, we found specific transposable elements (TE)  
181 that are enriched in the filled gaps (**Supplementary Fig. S4**). These include the chicken repeat 1  
182 (CR1) retroposon CR1-J2\_Pass and the long terminal repeat (LTR) GGLTR8B that have  
183 undergone recent lineage-specific bursts in duck after its divergence with other Galloanserae  
184 species (**Figure 2b, Supplementary Table S6**). These apparent evolutionarily young repeats  
185 relative to other repeats of the same family in ducks show a lower level of sequence divergence  
186 from their consensus sequences (**Supplementary Fig. S5**), and tend to insert into other older TEs  
187 and form a nested repeat structure (**Supplementary Fig. S6**).

188 Assembly of exon sequences embedded in such complex repetitive regions also led to the  
189 improvement of gene model annotations in our new assembly (e.g., **Figure 2c**). Overall, our new

190 gene annotation combining a total of 17 duck tissue transcriptomes and chicken protein queries  
191 has predicted 15,463 protein-coding genes, including 71 newly annotated chrW genes. We have  
192 identified 8,238 missing exons in the BGI1.0 assembly in 2,099 genes, including 745 genes that  
193 were completely missing. We also corrected 683 partial genes, and merged them into 356 genes  
194 in the new assembly. The overall quality of our new duck genome is better than that of the  
195 previous Sanger-based zebra finch, and comparable to the latest version of chicken[41] and VGP  
196 zebra finch genomes[29] (**Table 1**).

### 197 **Different genomic landscapes of duck micro- and macrochromosomes**

198 Our high-quality genome assembly and annotation of Pekin duck uncovered a different genomic  
199 landscape between the macro- and microchromosomes. Duck microchromosomes have a higher  
200 gene density than macrochromosomes per Mb sequence or per TAD domain ( $P < 2.2e-16$ ,  
201 Wilcoxon test). The recombination rate estimated from the published population genetic data[46]  
202 is also on average 2.3-fold higher on microchromosomes than on macrochromosomes (16.3 vs.  
203 7.2 per 50kb,  $P < 2.2e-16$ , Wilcoxon test), which drives more frequent GC-biased gene conversion  
204 (gBGC) on the microchromosomes[47]. Both factors have resulted in a higher average GC  
205 content of the microchromosomes (**Figure 3a-b**; 44.5 % vs. 39.3 % per 50kb,  $P < 2.2e-16$ ,  
206 Wilcoxon test). In addition, all chromosomes but chrZ (**Figure 3a**) show generally equal  
207 expression levels between sexes; genes on chrZ are expressed twice the level in males versus  
208 females. These chromosome-wide patterns are consistent with those reported in other birds  
209 regarding the differences between micro- and macrochromosomes, and a lack of global dosage  
210 compensation on avian sex chromosomes[1, 48, 49].

211 The completeness of our new duck genome is also demonstrated by its assembled centromeres  
212 (average length 443.3 kb) and telomeres (average length 73.7 kb), which were annotated by a  
213 cytogenetically verified *Anseriformes* centromeric repeat (APL-*HaeIII*)[50] and conserved  
214 telomeric motif sequences (**Supplementary Table S4-5**). We found 22 telomeric sites among  
215 the 31 chromosomes, of which 11 were interstitial telomeric repeat (ITR) sites inside the

216 chromosomes (**Figure 3a-b**, green arrow heads). Consistent with the reported karyotypes of duck  
217 and other birds[50, 51], almost all microchromosomes are acrocentric indicated by their positions  
218 of centromeric region. Both macro- and microchromosomes centromeres are enriched for CR1-  
219 J2\_Pass repeats (**Supplementary Fig. S7**), but microchromosome centromeres are specifically  
220 enriched for the LTR repeat GGERVL-A-int (**Figure 3b, Supplementary Fig. S8**). Such an  
221 interchromosomal difference of centromeric repeats has been reported in other birds and  
222 reptiles[52, 53], and is hypothesized to constitute the genomic basis for the spatial segregation of  
223 microchromosomes vs. macrochromosomes respectively in the interior vs. peripheral territories  
224 of the nucleus[54, 55]. Given their more aggregated spatial organization in the nuclear interior,  
225 microchromosomes exhibit an unusual pattern of more frequent inter-chromosomal interactions  
226 measured by the Hi-C data compared to macrochromosomes (**Supplementary Fig. S9**),  
227 consistent with the reported pattern of microchromosomes of chicken and snakes[56, 57].  
228 To examine whether the different genomic landscape between micro- vs. macrochromosomes  
229 would underlie different frequencies or molecular mechanisms of intragenomic rearrangements  
230 during evolution, we used our newly produced chromosomal genome of emu (with a similar  
231 assembly pipeline to be reported in a companion paper[57]) as the outgroup, and identified 80  
232 inversions on 26 chromosomes (>10kb, median size 1.5Mb, **Supplementary Table S7**) that  
233 occurred in the duck or *Anseriformes* lineage after it diverged from chicken in the past 72.5  
234 MY[34] (**Figure 3c-d**). The average inversion rate (1.1 inversion events or 3.1Mb inverted  
235 regions per MY) of Pekin duck is lower than that of 1.5-2.0 events or 6.6-7.5Mb per MY  
236 between flycatcher and zebra finch[12], reflecting more frequent intragenomic rearrangements in  
237 the passerines[58, 59]. There are 46 inversions on the duck macrochromosomes, and 34  
238 inversions on the microchromosomes, translating to 0.63 and 0.47 inversion events per MY, or  
239 1.96 and 1.09 Mb inverted sequence per MY, respectively. A lower rate and shorter spanned  
240 length of inversions on the microchromosomes is probably related to their higher densities of  
241 genes and CNEs[60], because of the natural selection against inversions that disrupt these

242 functional elements. Indeed, previous studies examining the breakpoint regions of genomic  
243 rearrangements of birds and mammals found that they tend to be devoid of CNEs[5, 61-63]. We  
244 also found that different families of TEs are significantly ( $P < 2.2e-16$ ) enriched at the inversion  
245 breakpoints of macro- vs. microchromosomes relative to other genomic regions (**Supplementary**  
246 **Fig. S10**), suggesting they play an important role in mediating the inversions. However, we did  
247 not find a higher recombination rate at the breakpoint regions (**Supplementary Fig. S11**), unlike  
248 that reported previously in flycatcher and zebra finch[12, 15].

### 249 250 **Comparative analyses of topological chromatin domain architectures**

251 Chromosomal inversions have attracted great interests of evolutionary biologists because they  
252 play an important role in local adaptation, speciation and sex chromosome formation[64]. We  
253 found that the duck or *Anseriformes* specific inversions (**Figure 3c-d**) are enriched for genes that  
254 function in immunity-related pathways (**Figure 4a**, e.g., ‘defense response to virus’, ‘G-protein  
255 coupled receptor pathway’;  $P < 0.0001$ , Fisher's Exact test), which may account for the known  
256 divergent susceptibility between chicken and duck against avian influenza virus. Indeed,  
257 RNF135 located on chr19, one of the ubiquitin ligases that regulate the RIG-I pathway  
258 responsible for the avian influenza virus response in ducks[65], is located in a duck-specific  
259 inversion.

260 To systematically evaluate the functional impacts of the identified duck or *Anseriformes* specific  
261 inversions, we examined if there were any relationships with TAD units as well as their enclosed  
262 gene expression patterns compared to chicken. Similar to mammals[66], the boundaries of duck  
263 TADs are also characterized with a significant enrichment of putative binding sites of insulator  
264 protein CTCF (**Supplementary Fig. S12**), an enrichment of broadly expressed housekeeping  
265 genes (**Supplementary Fig. S13**), and coincide with the transitions between active (A) and  
266 inactive (B) chromatin compartments (**Supplementary Fig. S14**). The diverse types of TAD  
267 boundaries of duck are not mutually exclusive (**Figure 4b**), and suggest conserved mechanisms

268 of TAD formation between birds and mammals[31]. The presence of putative CTCF binding  
269 sites, particularly with excessive pairs of binding sites in convergent orientation ('loop anchors')  
270 at the duck TAD boundaries (**Supplementary Fig. S15a-b**), suggested an active 'loop extrusion'  
271 mechanism involving both the extruding factors cohesin protein complex along chromatin and  
272 the counteracting CTCF protein[67]. In support of this, TAD boundaries that overlap with DNA  
273 loops have a significantly higher density of putative CTCF binding sites than any other TAD  
274 boundaries (**Supplementary Fig. S15c**). The overlap pattern between the TAD boundaries with  
275 the active/inactive compartment transition implies that self-organization of different chromatin  
276 types, probably driven by heterochromatin[68], underlies TAD formation. Finally, active  
277 transcription of genes[69] or TEs[70] have been recently discovered to account for TAD  
278 formation in mammals. We indeed found that various TEs located at the TAD boundaries have a  
279 significantly higher expression level ( $P < 0.01$ , Wilcoxon test) than their copies elsewhere in the  
280 genome. However, these boundary TEs generally show a lower population frequency, and a  
281 higher level of segregating sequence polymorphism ( $P < 0.05$ , Wilcoxon test) in their flanking  
282 sequences compared to the same families of TEs elsewhere (**Supplementary Fig. S16**),  
283 indicating that they are not under selection to fixation and may be recently inserted into the TAD  
284 boundaries. In addition, all the assembled centromere regions of metacentric chromosomes, and  
285 intriguingly 4 out of 11 ITRs (**Figure 2a,b**) coincide with the TAD boundaries (**Supplementary**  
286 **Figs. S7, 17**). This highlighted the uncharacterized role of ITRs in demarcating the functional  
287 domains in the chromosomes yet to be functionally tested in future.

288 We hypothesize that the TAD units or TAD boundaries are probably under strong selective  
289 constraint during evolution. This is suggested by some congenital diseases and cancer cases  
290 caused by disruptions of TADs through structural variations[71], and also sharing of TAD  
291 boundaries between distantly related species[66, 72]. A substantial proportion (42.6%) of duck  
292 TAD boundaries are shared with those of chicken (**Figure 4c**). This is probably an underestimate  
293 given that different tissues of Hi-C data were used here to identify TADs for the two bird

294 species. A comparable level of conservation of human TAD boundaries (53.8%) has also been  
295 observed with mouse[66], and expectedly a lower level (26.8%) of conservation has been  
296 observed between human and chicken[56]. The other evidence of strong selective constraints  
297 acting on the integrity of TADs come from our findings here on the pattern of chromosomal  
298 inversion breakpoints of duck, whose TAD insulation scores are significantly ( $P < 2.2e-16$ ,  
299 Wilcoxon test) lower (**Figure 4d**) than the TAD interior regions. That is, inversions more often  
300 precisely occurred at the TAD boundaries rather than within the TADs, i.e., disrupting the pre-  
301 existing TADs. Only one third of the detected inversions have both their breakpoints located  
302 within the TADs, whereas the remaining two thirds have both or one of their breakpoints  
303 overlapping with the TAD boundaries (**Figure 4e-g**). Novel TAD boundaries that were created  
304 by the duck-specific inversions (e.g., **Figure 4g**) tend to have significantly higher insulation  
305 scores, i.e., weaker insulation strengths than those that are conserved between duck and chicken  
306 (**Supplementary Fig. S18**). This suggests that natural selection may more frequently target  
307 evolutionarily older and stronger TAD boundaries. We have to point out the alternative  
308 explanation for the overlap between the TAD boundaries and inversion breakpoints (**Figure 4e**)  
309 is that chromatin loop anchors bound by CTCF protein are more likely genomic fragile sites  
310 vulnerable for DNA double-strand breaks[73] that induce the inversions. Consistent with this  
311 explanation, we found that the TAD boundaries that overlap with inversion breakpoints (**Figure**  
312 **4h, bottom**) have a significantly ( $P < 0.001$ , Chi-square test) higher percentage of loop anchors  
313 than others (**Figure 4h, top**).

314 Since the novel TADs generated by chromosome inversions (e.g., **Figure 4g**) may create  
315 aberrant or new promoter-enhancer contacts, and consequently divergent gene expression during  
316 evolution, we further compared the levels of gene expression divergence in the conserved TADs  
317 vs. those novel TADs that encompass inversion breakpoints between chicken and duck.

318 Interestingly, genes that are close to the novel TAD boundaries created by inversions only show  
319 slightly but not significantly higher levels of expression divergence than the genes located in the

320 conserved TADs, except for certain tissues (**Supplementary Fig. S19**). This reflects that the  
321 TAD boundary changes have only affected a few genes' expression patterns. It can be also  
322 explained by other regulatory divergences (e.g., in *cis*-elements) within the conserved TADs  
323 during the long-term divergence between chicken and duck, that have increased the target genes'  
324 expression divergence to the same degree as that in the novel TADs.

325

### 326 **Sex chromosome evolution of Pekin duck**

327 The Pekin duck provides a great model for understanding the process of avian sex chromosome  
328 evolution because the differentiation degree of its sex chromosomes is between those of ratites  
329 and chicken[27]. Previous comparative cytogenetic work found that the FISH probe of chicken  
330 chrZ cannot produce hybridization signals on chicken chrW because of their great sequence  
331 divergence, but instead can paint the entire chrW of duck and ostrich, suggesting that substantial  
332 sequence homology has been preserved between the Z/W chromosomes of the two species since  
333 the recombination was suppressed[27, 66]. The size of duck chrW is nevertheless smaller  
334 (estimated size 51Mb)[74, 75] compared to chrZ, probably because of extensive large deletions.  
335 Our new duck genome has assembled most of its chrZ derived from 53 scaffolds, except for 1.3  
336 Mb unanchored sequences, into one continuous sequence 84.5Mb long (**Supplementary Fig.**  
337 **S20**). The size of duck chrZ is similar to that of published chicken chrZ (82.5 Mb[76]).  
338 We determined 2.2Mb long PAR at the tip of chrZ (**Figure 5a**), based on its equal read coverage  
339 between sexes. This is consistent with previous cytogenetic work showing only one  
340 recombination nodule concentrated at the tip of the female duck sex chromosomes[77].  
341 Consistently, the PAR shows a significantly ( $P < 2.2e-16$ , Wilcoxon test) higher rate of  
342 recombination than the rest Z-linked SDR that do not have recombination in females (**Figure**  
343 **5a**). The distribution of GC content also exhibits a sharp shift at the PAR boundary because of  
344 the effect of gBGC (**Supplementary Fig. S21**). The evolution of chicken chrZ is marked by the  
345 acquisition of large tandem arrays of four gene families that are specifically expressed in

346 testis[18]. In contrast, we did not find similar tandem arrays of testis genes on chrZ of duck, and  
347 all of the four Z-linked chicken testis gene families are located on the autosomes of duck  
348 (**Supplementary Fig. S22**).

349 The assembled duck chrW assembly contains 36 scaffolds with a total length of 16.7Mb (about  
350 one third of the estimated size), all of which are almost exclusively mapped by female reads  
351 (**Supplementary Fig. S20**). It marks an 8.8-fold increase in size compared to our previous  
352 assembly using Illumina reads[20, 78], and is much longer than the most recent assembly of  
353 chicken chrW (6.7 Mb)[22]. We have annotated a total of 71 duck W-linked SDR genes, and all  
354 of them are single copy genes, compared to 27 single-copy genes and one multicopy gene on the  
355 chicken chrW, with 20 genes overlapped between the two (**Figure 5b**). The only multicopy  
356 chicken W-linked gene *HINTW* with about 40 copies[22] is present as a single-copy gene on the  
357 duck chrW. These results indicate that duck and chicken have independently evolved their sex-  
358 linked gene repertoire since their species divergence. The duck chrW retained more genes than  
359 chicken, and represents an intermediate stage of avian sex chromosome evolution between those  
360 of ratites and chicken.

361 Due to the intrachromosomal rearrangements of chrZ, most birds (including duck) except for  
362 ratites have retained few ancestral gene syntenies of their proto-sex chromosomes before the  
363 suppression of homologous recombination[20, 78], and exhibit dramatic reshuffling of their old  
364 evolutionary strata. In order to accurately reconstruct the history of duck sex chromosome  
365 evolution, we used a newly produced chrZ assembly of emu in our group to approximate the  
366 avian proto-sex chromosomes. Almost all (15.2Mb, 91%) of the duck chrW sequences can be  
367 aligned to the chrZ of emu, and form a clear pattern of four evolutionary strata. This is  
368 manifested as a gradient of Z/W pairwise sequence divergence, i.e., a gradient of the age of strata  
369 along the chrZ, which is named from the old to the young, as stratum 0, S0 to S3, (**Figure 5a**).  
370 Within each stratum, chrW scaffolds of similar levels of sequence divergence are clustered and  
371 separated from the neighbouring strata with different divergence levels (**Supplementary Fig.**



372 **S23**). The genes enclosed in each stratum are consistent with our previous annotation of the duck  
373 evolutionary strata based on the BGI1.0 genome, and show a consistent gradient of synonymous  
374 substitution rates (**Supplementary Fig. S24**) between the Z- and W-linked alleles according to  
375 the age of the strata where they reside. We did not find any chrW scaffolds that span the  
376 boundaries of neighbouring strata, probably because of some complex repeat sequences (e.g.,  
377 CR1-J2\_Pass) that accumulate at the boundary. Interestingly, the inferred boundaries between  
378 evolutionary strata on chrZ, i.e., the breakpoints between the inverted regions within or between  
379 the strata (8 out of 9 boundaries shown in **Figure 5a**) tend to have a low TAD insulation score,  
380 i.e., to overlap with TAD boundaries or loop anchors (**Supplementary Fig. S25**). This again  
381 strongly supports the idea that loop anchors or TAD boundaries are likely the genomic fragile  
382 regions that induced inversions.

383 Because of the lack of recombination, majorities (30 or 42.9%) of W-linked genes probably have  
384 become pseudogenes or long non-coding RNA genes due to frameshift mutations or premature  
385 stop codons (**Supplementary Fig. S26**). The other pronounced signature of functional  
386 degeneration of chrW is accumulation of TEs. The duck chrW shows a much higher genomic  
387 proportion (46.5% vs. 10.1%) and a different composition of TEs compared to the genome  
388 average (**Figure 5c**). The W-linked repeats are concentrated in those families that have  
389 specifically expanded their copy numbers in the duck after it diverged from other *Anseriformes*  
390 (**Supplementary Fig. S27, Supplementary Table S8**). Among them, different TE families  
391 exhibit opposing trends of colonizing the different evolutionary strata of different ages (**Figure**  
392 **5d, Supplementary Fig. S28**). TE families that have been propagating since the ancestor of  
393 Neoaves (e.g., CR1-J2\_Pass, **Supplementary Fig. S6**)[79] are more enriched in the older strata,  
394 while TE families that were specifically propagated in the duck (e.g., TguERV3\_I-int, **Figure**  
395 **2b**) are more enriched in the younger strata. This suggests that older evolutionary strata might be  
396 saturated for old TEs relative to TEs with recent activities. Particularly, duck or *Anseriformes*  
397 enriched repeats are nested with each other and form 38 palindromes dispersed across the entire

398 chrW (**Figure 5e**). Their lengths range from 15.2 kb to 345.5 kb (**Supplementary Table S9**),  
399 together comprising 3.74Mb or 22% of the assembled duck chrW sequence.

400

## 401 **Discussion**

402 Birds and mammals diverged over 300 MY ago and are known to have a very different  
403 chromosomal composition[1]. Our comparative analyses of the nearly complete genome of the  
404 Pekin duck revealed that TADs are conserved functional and evolutionary chromosome units in  
405 both birds and mammals. The 40% to 50% of the TADs shared between chicken and duck is  
406 comparable to the proportions shared between human and mouse[66]. This is also consistent with  
407 the highly conserved pattern of replication domains between human and mouse[80], which have  
408 a nearly one-to-one correspondence with TADs[81]. The interspecific overlap of TADs implies  
409 strong selection on TAD integrity during evolution. In this work, we identified many  
410 chromosomal inversions between chicken and duck that were previously uncharacterized  
411 because of the fragmented duck Illumina-based genome. Consistent with selection against the  
412 genome rearrangements disrupting the TADs, there are disproportionately more chromosome  
413 inversions that occurred at the TAD boundaries than within the TADs. This extensive overlap  
414 between TAD boundaries and inversion breakpoints likely reflects the susceptibility of TAD  
415 boundaries to DNA double-strand breaks. TADs can form either by self-organization of genomic  
416 regions of the same epigenetic state, or by active loop extrusion involving the cohesin and  
417 insulator protein CTCF[67]. This is indicated by the transition between active and inactive  
418 chromatin compartments or the enrichment of CTCF binding sites at the TAD boundaries of  
419 duck (this study), chicken[56], and mammals[66]. It has been recently shown that type II  
420 topoisomerase B (TOP2B), which releases the DNA torsional stress by transiently breaking and  
421 rejoining DNA double-strands, physically interacts with cohesin and CTCF and colocalizes with  
422 the TAD boundaries with convergent CTCF binding site pairs (loop anchors)[73]. This probably  
423 frequently exposes the TAD boundaries to double-strand breaks, and induces chromosomal

424 inversions involving the entire TAD. This mechanism may also account for the common  
425 genomic fragile sites found in both birds and mammals that have been reused during evolution to  
426 mediate genomic rearrangements[7, 11, 13, 82]. Overall, despite divergent chromosomal  
427 composition, our results suggested conserved mechanisms of chromosome folding and  
428 rearrangements between birds and mammals.

429 The two clades of vertebrates also evolved convergent sex chromosome architectures. Our  
430 finding that the duck chrW has suppressed recombination with chrZ in a stepwise manner is  
431 similar to the pattern of evolutionary strata between the human X and Y chromosomes[19]. As  
432 the result of recombination suppression, the duck chrW has accumulated massive TEs, some of  
433 which formed dispersed palindromes along the chromosome. Unlike other sex-specific  
434 palindromes reported in primates, birds and willow[25, 26, 83-85], the duck palindromes do not  
435 seem to contain functional genes that have robust gene expression. This suggests that the gene  
436 copies contained in the palindromes may have nevertheless become pseudogenes, despite the  
437 repair mechanism mediated by gene conversions between gene copies within the palindromes.

438 Or the involved genes have already become a pseudogene before being amplified by the  
439 palindromes. An interesting contrast is that we did not find palindromes on our recently  
440 assembled emu chrW with a similar dataset and pipeline, which evolves much slower than  
441 chrWs of chicken and duck. Palindromes were also not reported in the recently evolved  
442 *Drosophila miranda* chrY[86]. These results suggest that sex-linked palindromes are a feature of  
443 strongly differentiated sex chromosomes which have accumulated abundant TEs. The  
444 palindromes may retard the functional degeneration of Y- or W-linked genes, but can also  
445 promote large sequence deletions by intrachromosomal recombination. The latter probably  
446 contributed to the much smaller size of chrW relative to the chrZ of duck, despite many more  
447 genes than the chrW of chicken have been preserved.

448

449 **Methods**

450 **Genome assembly**

451 High molecular weight DNA (HMW DNA) was extracted from the liver of a female Pekin duck  
452 (*Anas platyrhynchos*, Z2 strain) with Gentra Puregene Tissue Kit (Qiagen #158667). Libraries for  
453 SMRT sequencing were constructed as described previously[87]. In total, 115 SMRT cells were  
454 sequenced with PacBio RS II and Sequel platform (Pacific Biosciences), and 186 Gb (143-X  
455 genome coverage) subreads with an N50 read length of 14,262 bp were produced. The same DNA  
456 was used to generate a linked-reads library following the protocol on the 10X Genomics Chromium  
457 platform (Genome Library Kit & Gel Bead Kit v2 PN-120258, Genome HT Library Kit & Gel Bead  
458 Kit v2 PN-120261, Genome Chip Kit v2 PN-120257, i7 Multiplex Kit PN-120262). This 10X  
459 library was subjected to MGISEQ-2000 platform for sequencing and 185 Gb PE150 (142-X  
460 genome coverage) reads were collected. HMW DNA of a male Pekin duck was used to produce the  
461 BioNano library with the Enzyme Nt.BspQ1. After the enzyme digestion, segments of the DNA  
462 molecules were labeled and counterstained following the IrysPrep Reagent Kit protocol (Bionano  
463 Genomics) as described previously[88]. Libraries were then loaded into IrysChips and run on the  
464 Irys imaging instrument, and a total of 73 Gb (56-X genome coverage) optical map data were  
465 generated. We used the HMW DNA from the breast muscle of a male Pekin duck to prepare the Hi-  
466 C library using the restriction enzyme Mbol with the protocol described previously[30] and  
467 produced a total of 106Gb (82-X genome coverage) pair-end reads of 50bp long on the Illumina  
468 HiSeq X Ten platform. We used the published genome resequencing data of 14 female and 11 male  
469 duck individuals from[46]. We collected the total RNAs of adult tissues (brain, kidney, gonads) of  
470 both sexes using TRIzol® Reagent (Invitrogen #15596-018) following the manufacturers'  
471 instructions. Then paired-end libraries were constructed using NEBNext® Ultra™ RNA Library  
472 Prep Kit for Illumina® (NEB, USA) and 3Gb paired-end reads of 150bp were produced for each  
473 library.

474 We generated the genome assembly with the modified Vertebrate Genomes Project (VGP) (v1.0)  
475 pipeline[29]. In brief, we produced the contig sequences derived from the PacBio subreads using

476 FALCON[89] (git 12072017) followed by two rounds of assembly polishing by Arrow[90], and  
477 then by Purge Haplotigs[91] (bitbucket 7.10.2018) to remove false haplotype and homotypic  
478 duplications. The contigs were then scaffolded first with 10x linked reads using Scaff10X  
479 (<https://github.com/wtsihpag/Scaff10X>), then with BioNano optical maps using runBNG[92]  
480 (v1.0.3), and finally with Hi-C reads using SALSA[93] (v2.0). We performed gap filling on the  
481 scaffolds with the Arrow-corrected PacBio subreads by PBJelly[94], and two rounds of assembly  
482 polishing with Illumina reads by Pilon[95] (v1.22). All the scripts used from the VGP assembly  
483 pipeline[29] are available at <https://github.com/VGP/vgp-assembly>. We evaluated the genome  
484 completeness using BUSCO[96] (v3.0.2). In brief, 4,915 benchmarking universal single-copy  
485 ortholog (BUSCO) proteins of birds from OrthoDB v9 were used in the evaluation.

486

#### 487 **Genome annotation**

488 We combined evidence of protein homology, transcriptome and *de novo* prediction to annotate the  
489 protein-coding genes. First, we aligned the protein sequences of human, chicken, duck and zebra  
490 finch collected from Ensembl[97] (release 90) to the reference genome using TBLASTN[98]  
491 (v2.2.26) with parameters: -F F -p tblastn -e 1e-5. The resulting candidate genes were then refined  
492 by GeneWise[99] (v2.4.1). For each candidate gene, only the one with the best score was kept as  
493 the representative model. We filtered the candidate genes, if they contain premature stop codons or  
494 frameshift mutations reported by GeneWise[99]; or if single-exon genes with a length shorter than  
495 100bp, or multi-exon genes with a length shorter than 150bp; or if the repeat content of the CDS  
496 sequence is larger than 20%. Second, to obtain the *de novo* gene models, we used the protein  
497 queries to train Augustus[100] (v3.3) with default parameters. We also used all available RNA-seq  
498 reads to construct transcripts using Trinity[101] (v2.4.0). Finally, all the gene models from the  
499 above three resources were merged into a non-redundant gene set with EVidenceModeler[102]  
500 (v1.1.1). We used RepeatMasker[103] (v4.0.8) with parameters: -s -pa 4 -xsmall, and the  
501 RepBase[104] (v21.01) queries to annotate the repetitive elements.

502 To annotate the putative centromeres, we searched the genome with the reported 190bp duck  
503 centromeric repeats[50] using TRFinder[105] (v4.09) with the parameters: 2 5 7 80 10 50 2000. A  
504 genome-wide distribution of the 190bp sequences was generated by binning the genome with a  
505 50kb non-overlapping window to find the local enrichment of copy numbers, which was defined as  
506 the putative centromeres. For telomeres, we used the known vertebrate consensus sequence[106]  
507 ‘TTAGGG/CCCTAA’ to search for the clusters of consensus sequence on both strands from the  
508 above tandem repeat annotation. Consensus sequence enriched genomic blocks in a 50kb window  
509 were then defined as the putative telomere regions.

510

### 511 **Building the chromosomal sequences and identifying the sex-linked sequences**

512 To anchor Pekin duck scaffolds onto chromosomes, we first collected the ordered 1689 RHmap  
513 linked contigs[32] and 155 BAC clone sequences[33] from the previous studies. We aligned these  
514 sequences, as well as the Illumina duck genome[36] (BGI1.0) to the new duck scaffolds we  
515 generated by nucmer[107] (v3.23) packages (<http://mummer.sourceforge.net>) and only kept the best  
516 hits for each sequence. Scaffolds were orientated and ordered first based on the RHmap contigs that  
517 span more than one scaffold, then by BAC sequences whose order was determined previously by  
518 FISH, and finally by the syntenic relationship with the BGI1.0 genome. We also corrected  
519 scaffolding errors using the raw PacBio reads, if the order of our scaffolds had conflicts with that of  
520 RHmap or BAC sequence order (**Supplementary Fig. S2**).

521 To identify the sex-linked sequences, Illumina reads from both sexes were aligned to the scaffold  
522 sequences using BWA ALN[108] with default parameters. Read depth of each sex was then  
523 calculated using SAMtools[109] in 5kb non-overlapping windows, and normalized against the  
524 median value of depths per single base pair throughout the entire genome, respectively, to enable  
525 the comparison between sexes. To identify the Z-linked sequences, the depth ratio of male-vs-  
526 female (M/F) was calculated for the genomic regions mapped by reads for each sequences, with a  
527 minimum 80% coverage in both sexes, and sequences with a depth ratio ranging from 1.5 to 2.5

528 were assigned as Z-linked. To identify the W-linked sequences, we calculated M/F depth ratio as  
529 well as M/F coverage ratio and assigned scaffolds to W-linked when either ratio was within the  
530 range from 0.0 to 0.25 as W-linked sequences (**Supplementary Fig. S21**). Since we do not have  
531 linkage markers on the W chromosome, we ordered the W scaffolds based on their unique aligned  
532 position with the Z chromosome using RaGOO[110] (v1.1) with default parameters  
533 (<https://github.com/malonge/RaGOO>). This does not reflect the actual order of W-linked sequences  
534 which probably have rearrangements with the homologous Z chromosome, but allows us to  
535 examine the pattern of evolutionary strata.

536 To identify the inversions in the duck genome, genomic syntenic blocks between chicken and duck,  
537 and emu and duck were constructed using nucmer (v3.1) with the parameters: -b 500 -l 20. Then  
538 inversions between chicken and duck were manually checked by plotting the dot plot between the  
539 two species. The duck specific inversions were identified by excluding chicken-specific inversion,  
540 using emu as the outgroup.

541

## 542 **Hi-C analyses**

543 Hi-C read mapping, filtering, correction, binning and normalization were performed by HiC-  
544 Pro[111] (v2.10.0) with the default parameters. In brief, Hi-C reads of chicken[112] (sourced from  
545 FR-AgENCODE project) and duck were mapped to the respective reference genome and only  
546 uniquely mapped reads were kept. Then each uniquely mapped reads were assigned to a restriction  
547 fragment and invalid ligation products were discarded. Data was then merged and binned to  
548 generate the genome-wide interaction maps at 10kb and 50kb resolution. TADs were identified by  
549 HiCExplorer[113] (v3.0) with the application hicFindTADs. First, HiC-Pro interaction maps were  
550 transformed to h5 format matrix by hicConvertFormat with parameters: --inputFormat hicpro --  
551 outputFormat h5. Then the h5 matrix was imported to hicFindTADs with parameters:--outPrefix  
552 TAD --numberOfProcessors 32 --correctForMultipleTesting fdr. hicFindTADs identifies the TAD  
553 boundaries through an approach that computes a TAD insulation score. Genomic bins with low

554 insulation scores relative to neighboring regions were defined as local minima and called as the  
555 TAD boundaries. Human CTCF[114] motif was used as a query for FIMO in MEME[115]  
556 (v4.12.0) to identify the putative CTCF binding sites. CTCF density in every 10kb non-overlapping  
557 sliding window along the genome was calculated to check its enrichment at the TAD boundaries.  
558 We identified the A/B compartments using the `pca.hic` function from HiTC[116] (High Throughput  
559 Chromosome Conformation Capture analysis) R package with default parameters, and the 10kb  
560 matrix generated by HiC-Pro as the input. We identified the chromatin loops by Mustache[117]  
561 with the parameters: `-p 32 -r 10kb -pt 0.05`, after converting the h5 format matrix to mcool matrix  
562 format by `hicConvertFormat` with parameters: `--inputFormat h5 --outputFormat mcool`.

### 563 **Evolutionary strata**

564 To demarcate the evolutionary strata, all the repeat masked duck W-linked scaffolds were aligned to  
565 emu Z chromosome using LASTZ[118] (v0.9) with parameters: `--step=19 --hspthresh=2200 --`  
566 `inner=2000 --ydrop=3400 --gappedthresh=10000 --format=axt`, and a score matrix set for the distant  
567 species comparison. Alignments were converted into ‘net’ and ‘maf’ results using UCSC Genome  
568 Browser’s utilities (<http://genomewiki.ucsc.edu/index.php/>). Based on ‘net’ and ‘maf’ results, the  
569 identity of the aligned sequence was calculated for each alignment block with a 10kb non-  
570 overlapped window and then we oriented the aligned W-linked sequences along the Z  
571 chromosomes. Then we color-coded the pairwise sequence divergence level between the Z/W  
572 sequences to demarcate the evolutionary strata.

### 573 **Gene expression analyses**

574 RNA-seq reads were mapped to the duck genome by HISTA2[119] with default parameters. Only  
575 uniquely mapped RNA-seq reads were kept and used to calculate the RPKM expression level.  
576 DESeq2[120] was applied to normalize the RPKM values across different samples and finally  
577 generated an expression matrix. For each gene, we used the median expression value in each tissue



578 to calculate the tissue specificity index TAU[121, 122]. Expression levels of TE elements were  
579 calculated using SQUIRE[123] (v0.9.9.92) (<https://github.com/wyang17/SQUIRE>) with default  
580 parameters.

581

### 582 **Data availability**

583 The assembly and annotation of Pekin duck has been deposited in GenBank under the Bioproject  
584 accession code PRJNA636121 (accession number JACGAL000000000) and the emu under  
585 PRJNA638233 (accession number JABVCD000000000).

586

### 587 **Code availability**

588 Scripts used in this study are shared on GitHub at <https://github.com/ZhouQiLab/DuckGenome>

589

### 590 **Acknowledgment**

591 Q.Z. is supported by the National Natural Science Foundation of China (31722050, 31671319),  
592 the Natural Science Foundation of Zhejiang Province (LD19C190001) and the European  
593 Research Council Starting Grant (grant agreement 677696). We thank BGI-Shenzhen for  
594 providing the 10x linked reads data of duck.

595

### 596 **Conflict of interest statement**

597 None declared.

598

### 599 **Authors' contributions**

600 Q. Z. conceived the project and acquired the funding; J. L., X. D., S. F., C. G., J. R., K. W.,  
601 acquired the samples and produced the data; J. L., J. Z., J. L., Y. Z., C. C., L. X., Q. Z. performed  
602 the analyses.; J. L., Y. J. , Z. Z., G. Z., E. J. and Q. Z. wrote the paper.

603

604 **Table 1. Comparing genome assemblies of duck vs. other birds**

|                               | Pekin duck<br>(BGI1.0) | Pekin duck<br>(ZJU1.0) | Chicken<br>(Ncbi-6a) | Zebra finch<br>(VGP) |
|-------------------------------|------------------------|------------------------|----------------------|----------------------|
| total length (Gb)             | 1.105                  | 1.189                  | 1.065                | 1.069                |
| #contigs                      | 227,448                | 1,645                  | 1,403                | 1,053                |
| total contig length (Gb)      | 1.07                   | 1.182                  | 1.056                | 1.047                |
| maximum contig length (Mb)    | 0.264                  | 28.519                 | 65.778               | 29.008               |
| contig N50 (Mb)               | 0.026                  | 5.534                  | 17.655               | 4.378                |
| #scaffolds                    | 78,487                 | 755                    | 525                  | 205                  |
| longest scaffold length (Mb)  | 5.998                  | 207.238                | 197.608              | 151.897              |
| scaffold N50 (Mb)             | 1.234                  | 76.269                 | 82.53                | 70.879               |
| total gap length (Mb)         | 35.08                  | 4.378                  | 9.784                | 21.569               |
| anchored into chromosomes (%) | 25.9                   | 95.6                   | 98.6                 | 97.2                 |
| gap content (%)               | 3.17                   | 0.37                   | 0.92                 | 2.02                 |
| BUSCO (%)                     | 91.5                   | 94.2                   | 95.1                 | 95.1                 |

605

606 **Figures**

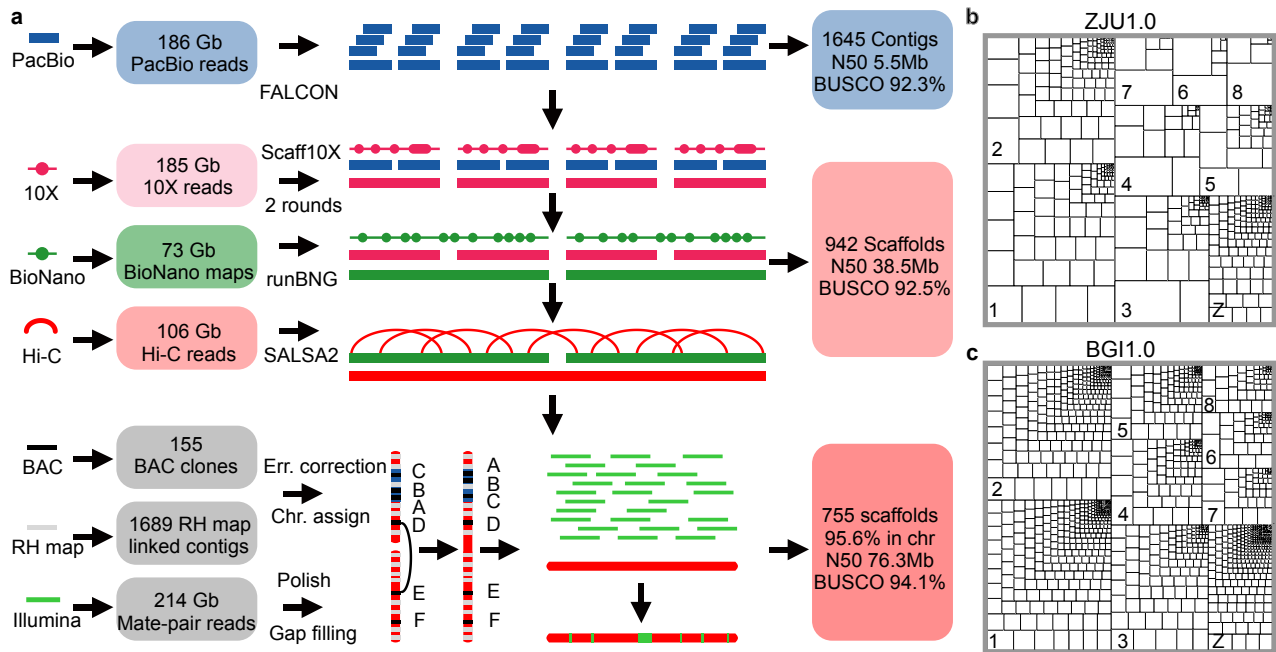

607

608 **Figure 1. Genome assembly of a female Pekin duck. a.** Our assembly pipeline uses high

609 coverage PacBio long reads to generate contigs, which are then sequentially scaffolded with 10X

610 Genomics linked reads, BioNano optical maps, Hi-C paired reads, RH maps and FISH maps, to

611 produce a chromosome-level genome for the Pekin duck. **b, c.** Treemap comparison of contigs

612 between ZJU1.0 and BGI1.0 versions of the duck genome. The size of each rectangle of each

613 chromosome is scaled to that of contig sequence. The bigger and fewer the internal boxes, the

614 more contiguous the contigs.

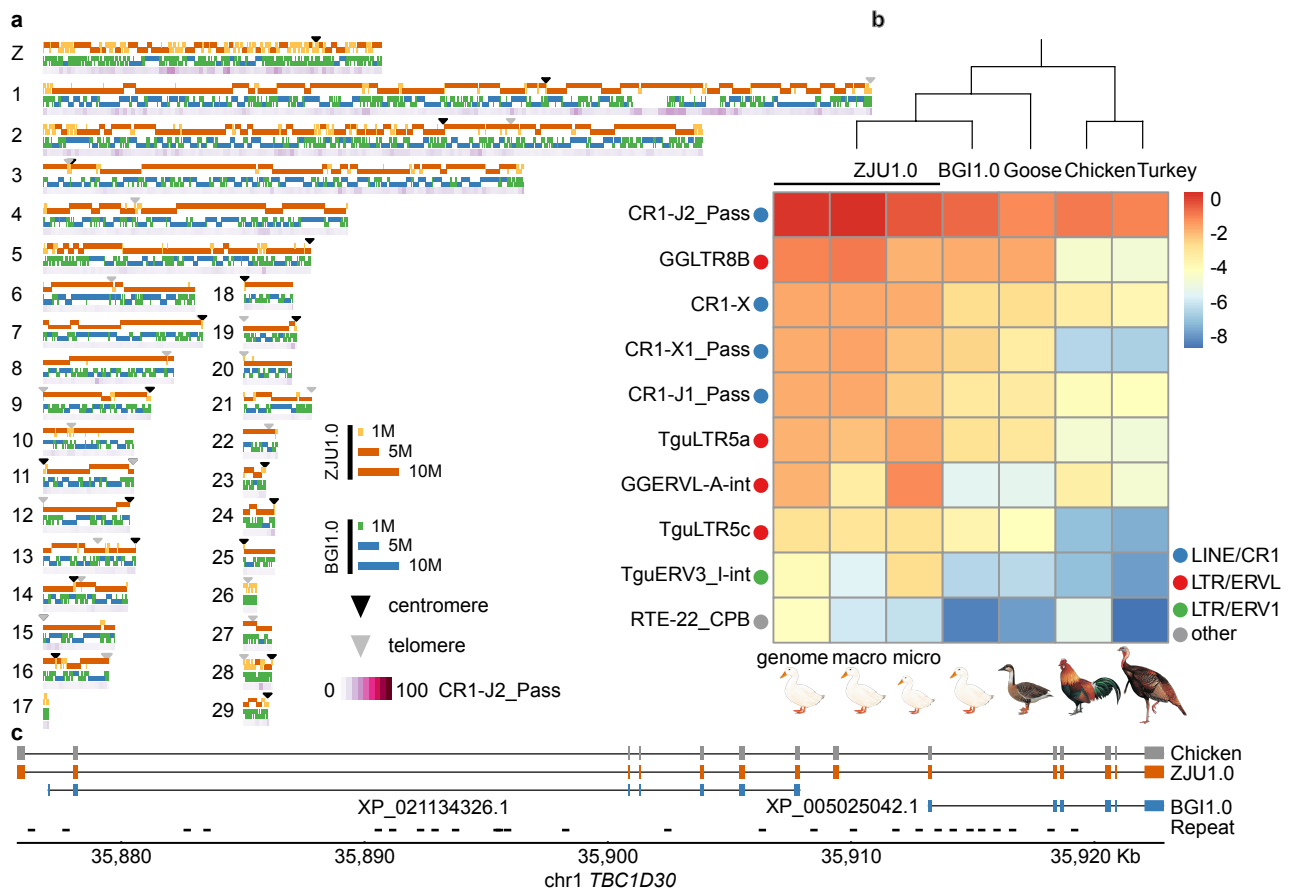

615

616 **Figure 2. Comparing the new duck genome to other avian genomes a.** Schematic plot of each

617 chromosome, showing the mapped contigs of ZJU1.0 (orange/yellow) and BGI1.0 (blue/green),

618 putative centromeres (black triangles), and telomeres or interstitial telomeric sequences (grey

619 triangles), and the most abundant repeat CR1-J2\_Pass present in the gap regions of BGI1.0

620 (purple gradient). **b.** Comparisons of the top 10 most abundant repeats in the duck genome

621 (ZJU1.0 whole genome, macrochromosomes, microchromosomes, and BGI1.0 assembly) to

622 other Galloanseriformes bird genomes (goose, chicken, turkey). The more red, the higher

623 proportion of assembled repeat content. **c.** An example gene annotation improvement showing

624 two genes in the BGI1.0 genome are really one gene in the ZJU1.0 genome, and were

625 fragmented into two because of low resolution of repeat sequences disrupting the previous

626 genome assembly of exons.

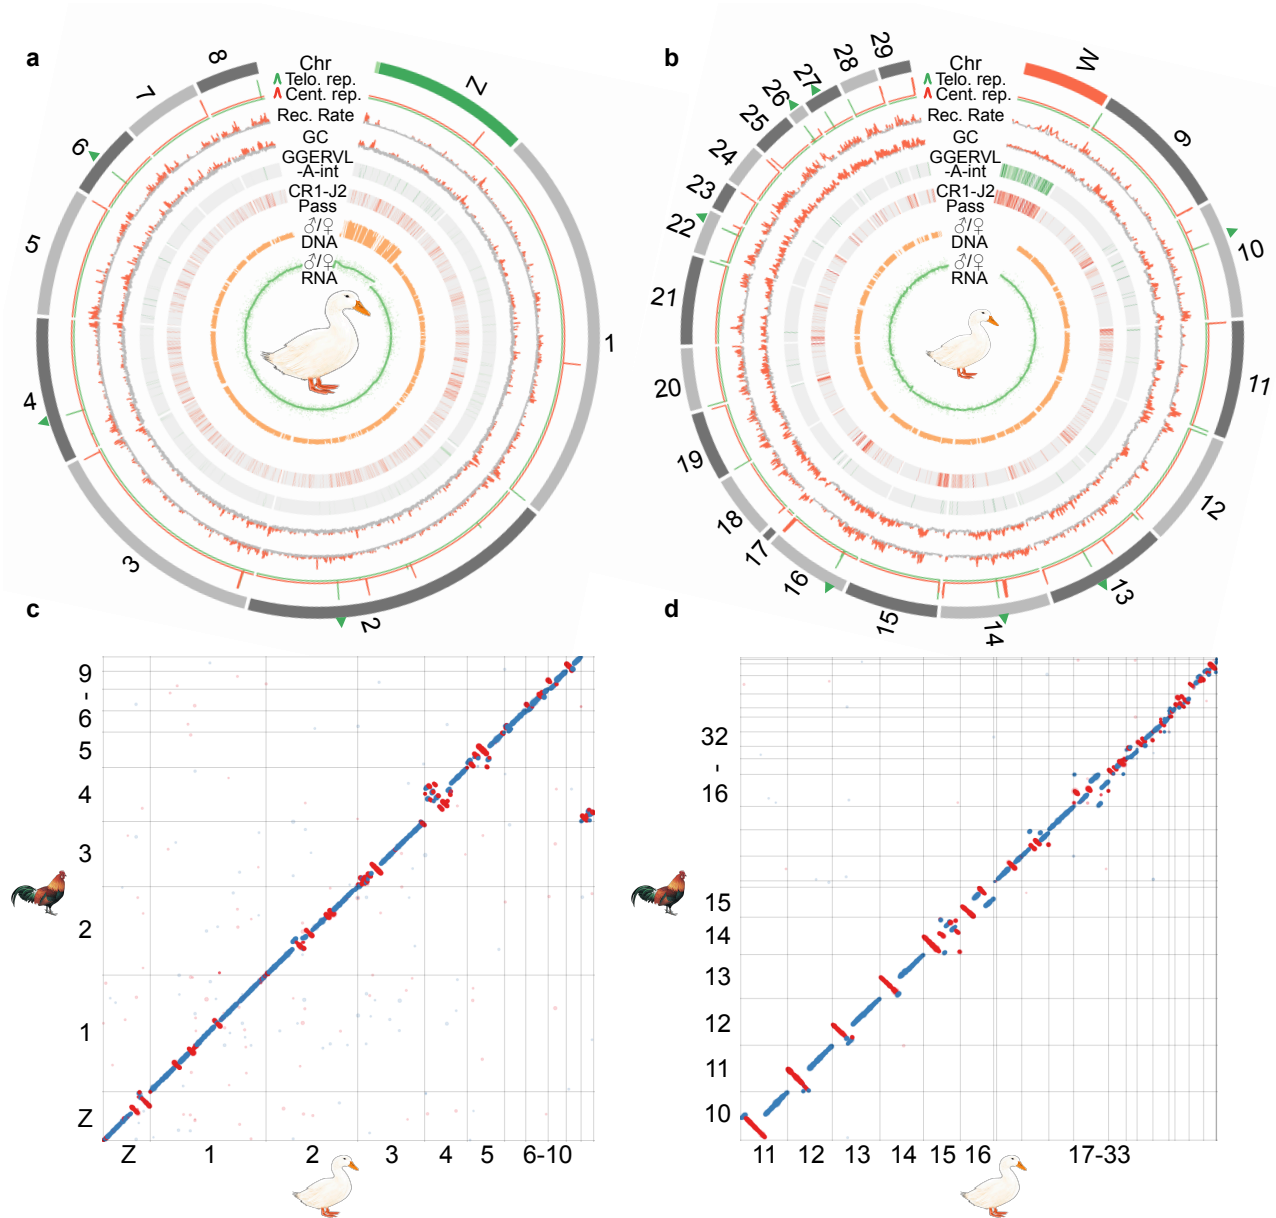

627

628 **Figure 3. Evolution of the duck macro- and microchromosomes.** From the outer to inner  
 629 rings: the macro- (a) and microchromosomes (b), together with Z/W chromosomes (green/red  
 630 color), and the pseudoautosomal regions (PARs) labelled with light green color at the tip of chrZ.  
 631 Interstitial telomere sequences were labelled with green triangles on the chromosome. Putative  
 632 centromeres (red lines) and telomeres (green lines) were inferred by the enrichment of  
 633 centromeric and telomeric repeat copies, which show a sharp peak. We then show the  
 634 recombination rate and GC content calculated in non-overlapping 50kb windows, as well as two  
 635 repeat families (GGERVL-A-int and CR1-J2 Pass) that we identified to be enriched at  
 636 centromeric regions and chrW. We also show the male vs. female (M/F) ratios of Illumina DNA

637 sequencing coverage in non-overlapping 50kb windows, M/F expression ratios (each green dot  
638 as one gene) of the adult brain tissue and the smoothed line. **c-d.** Dot plots show the inversions  
639 between chicken and duck genome for both macro and micro chromosomes.

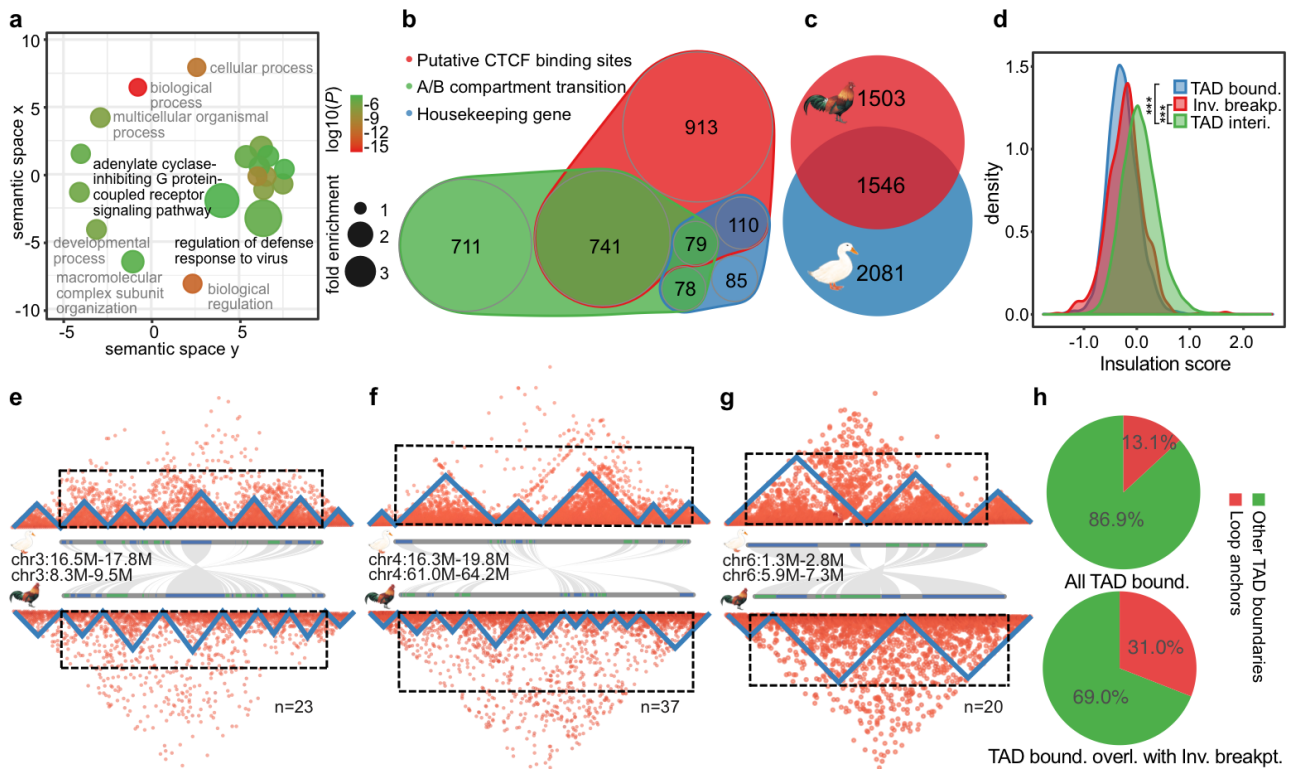

640

641 **Figure 4. Genome inversions and topologically associated domains.** **a.** Enriched GO terms of  
 642 the genes included in the duck specific inversions. The x- and y-axes measure the GO term  
 643 semantic similarities, which are used to remove the GO redundancies. **b.** Scaled Venn diagram  
 644 shows the different compositions of TAD boundaries in duck. **c.** Scaled Venn diagram shows the  
 645 TAD boundaries shared between chicken and duck. **d.** Inversion breakpoint regions tend to show  
 646 a significantly lower insulation score than the TAD interior regions. **e-g.** We show the Hi-C  
 647 heatmaps with each triangle structure indicating one TAD, along with the gene (blue or green  
 648 bars) synteny plot between chicken and duck. Three examples are presented to show the impact  
 649 of inversions between duck and chicken on TAD structure, with both inversion breakpoints (e),  
 650 one inversion breakpoint (f), and no breakpoint (g), overlapped with the TAD boundaries. We  
 651 also show the numbers of inversions that fit into each category. **h.** Pie charts showing that TAD  
 652 boundaries that overlap with inversion breakpoints (bottom) have a higher percentage of loop  
 653 anchors than others (top).





669 **Reference**

- 670 1. Zhang G, Li C, Li Q, Li B, Larkin DM, Lee C, et al. Comparative genomics reveals insights  
671 into avian genome evolution and adaptation. *Science*. 2014;346 6215:1311-20.  
672 doi:10.1126/science.1251385.
- 673 2. Burt DW. Origin and evolution of avian microchromosomes. *Cytogenet Genome Res*.  
674 2002;96 1-4:97-112. doi:10.1159/000063018.
- 675 3. Burt DW, Bruley C, Dunn IC, Jones CT, Ramage A, Law AS, et al. The dynamics of  
676 chromosome evolution in birds and mammals. *Nature*. 1999;402 6760:411-3.  
677 doi:10.1038/46555.
- 678 4. Griffin DK, Robertson LBW, Tempest HG and Skinner BM. The evolution of the avian  
679 genome as revealed by comparative molecular cytogenetics. *Cytogenet Genome Res*.  
680 2007;117 1-4:64-77. doi:10.1159/000103166.
- 681 5. Damas J, Kim J, Farré M, Griffin DK and Larkin DM. Reconstruction of avian ancestral  
682 karyotypes reveals differences in the evolutionary history of macro- and  
683 microchromosomes. *Genome Biol*. 2018;19 1:155. doi:10.1186/s13059-018-1544-8.
- 684 6. Nanda I, Karl E, Griffin DK, Schartl M and Schmid M. Chromosome repatterning in three  
685 representative parrots (Psittaciformes) inferred from comparative chromosome painting.  
686 *Cytogenet Genome Res*. 2007;117 1-4:43-53. doi:10.1159/000103164.
- 687 7. O'Connor RE, Farré M, Joseph S, Damas J, Kiazim L, Jennings R, et al. Chromosome-level  
688 assembly reveals extensive rearrangement in saker falcon and budgerigar, but not ostrich,  
689 genomes. *Genome Biol*. 2018;19 1:171. doi:10.1186/s13059-018-1550-x.
- 690 8. Nishida C, Ishijima J, Kosaka A, Tanabe H, Habermann FA, Griffin DK, et al.  
691 Characterization of chromosome structures of Falconinae (Falconidae, Falconiformes, Aves)  
692 by chromosome painting and delineation of chromosome rearrangements during their  
693 differentiation. *Chromosome Research*. 2008;16 1:171-81. doi:10.1007/s10577-007-1210-6.
- 694 9. Jarvis ED, Mirarab S, Aberer AJ, Li B, Houde P, Li C, et al. Whole-genome analyses  
695 resolve early branches in the tree of life of modern birds. *Science*. 2014;346 6215:1320-31.
- 696 10. Volume 4: Chordata 3: B. Aves. In: Les C, editor. *Animal Cytogenetics*. Berlin, Germany:  
697 Gebrüder Borntraeger; 1990. p. 55-7.
- 698 11. Skinner BM and Griffin DK. Intrachromosomal rearrangements in avian genome evolution:  
699 evidence for regions prone to breakpoints. *Heredity*. 2012;108 1:37-41.  
700 doi:10.1038/hdy.2011.99.
- 701 12. Kawakami T, Smeds L, Backström N, Husby A, Qvarnström A, Mugal CF, et al. A high-  
702 density linkage map enables a second-generation collared flycatcher genome assembly and  
703 reveals the patterns of avian recombination rate variation and chromosomal evolution.  
704 *Molecular Ecology*. 2014;23 16:4035-58. doi:10.1111/mec.12810.
- 705 13. Pevzner P and Tesler G. Human and mouse genomic sequences reveal extensive breakpoint  
706 reuse in mammalian evolution. *Proc Natl Acad Sci U S A*. 2003;100 13:7672-7.  
707 doi:10.1073/pnas.1330369100.
- 708 14. Larkin DM, Pape G, Donthu R, Auvil L, Welge M and Lewin HA. Breakpoint regions and  
709 homologous synteny blocks in chromosomes have different evolutionary histories. *Genome*  
710 *Res*. 2009;19 5:770-7. doi:10.1101/gr.086546.108.
- 711 15. Völker M, Backström N, Skinner BM, Langley EJ, Bunzey SK, Ellegren H, et al. Copy  
712 number variation, chromosome rearrangement, and their association with recombination  
713 during avian evolution. *Genome Res*. 2010;20 4:503-11. doi:10.1101/gr.103663.109.
- 714 16. Lemaitre C, Zaghloul L, Sagot M-F, Gautier C, Arneodo A, Tannier E, et al. Analysis of  
715 fine-scale mammalian evolutionary breakpoints provides new insight into their relation to  
716 genome organisation. *BMC Genomics*. 2009;10:335. doi:10.1186/1471-2164-10-335.
- 717 17. Irwin DE. Sex chromosomes and speciation in birds and other ZW systems. *Mol Ecol*.  
718 2018;27 19:3831-51. doi:10.1111/mec.14537.

- 719 18. Bellott DW, Skaletsky H, Pyntikova T, Mardis ER, Graves T, Kremitzki C, et al.  
720 Convergent evolution of chicken Z and human X chromosomes by expansion and gene  
721 acquisition. *Nature*. 2010;466 7306:612-6. doi:10.1038/nature09172.
- 722 19. Lahn BT and Page DC. Four evolutionary strata on the human X chromosome. *Science*.  
723 1999;286 5441:964-7. doi:10.1126/science.286.5441.964.
- 724 20. Zhou Q, Zhang J, Bachtrog D, An N, Huang Q, Jarvis ED, et al. Complex evolutionary  
725 trajectories of sex chromosomes across bird taxa. *Science*. 2014;346 6215:1246338.  
726 doi:10.1126/science.1246338.
- 727 21. Cortez D, Marin R, Toledo-Flores D, Froidevaux L, Liechti A, Waters PD, et al. Origins and  
728 functional evolution of Y chromosomes across mammals. *Nature*. 2014;508 7497:488-93.  
729 doi:10.1038/nature13151.
- 730 22. Bellott DW, Skaletsky H, Cho T-J, Brown L, Locke D, Chen N, et al. Avian W and  
731 mammalian Y chromosomes convergently retained dosage-sensitive regulators. *Nat Genet*.  
732 2017;49 3:387-94. doi:10.1038/ng.3778.
- 733 23. Skaletsky H, Kuroda-Kawaguchi T, Minx PJ, Cordum HS, Hillier L, Brown LG, et al. The  
734 male-specific region of the human Y chromosome is a mosaic of discrete sequence classes.  
735 *Nature*. 2003;423 6942:825-37. doi:10.1038/nature01722.
- 736 24. Charlesworth B and Charlesworth D. The degeneration of Y chromosomes. *Philosophical*  
737 *Transactions of the Royal Society of London Series B: Biological Sciences*. 2000;355  
738 1403:1563-72. doi:10.1098/rstb.2000.0717.
- 739 25. Davis JK, Program NCS, Thomas PJ and Thomas JW. A W-linked palindrome and gene  
740 conversion in New World sparrows and blackbirds. *Chromosome Research*. 2010;18 5:543-  
741 53. doi:10.1007/s10577-010-9134-y.
- 742 26. Zhou R, Macaya-Sanz D, Carlson CH, Schmutz J, Jenkins JW, Kudrna D, et al. A willow  
743 sex chromosome reveals convergent evolution of complex palindromic repeats. *Genome*  
744 *Biol*. 2020;21 1:38. doi:10.1186/s13059-020-1952-4.
- 745 27. Nanda I, Schlegelmilch K, Haaf T, Schartl M and Schmid M. Synteny conservation of the Z  
746 chromosome in 14 avian species (11 families) supports a role for Z dosage in avian sex  
747 determination. *Cytogenetic and Genome Research*. 2008;122 2:150-6.  
748 doi:10.1159/000163092.
- 749 28. Xu L, Wa Sin SY, Grayson P, Edwards SV and Sackton TB. Evolutionary Dynamics of Sex  
750 Chromosomes of Paleognathous Birds. *Genome Biol Evol*. 2019;11 8:2376-90.  
751 doi:10.1093/gbe/evz154.
- 752 29. Rhie A, McCarthy SA, Fedrigo O, Damas J, Formenti G, Koren S, et al. Towards complete  
753 and error-free genome assemblies of all vertebrate species. *bioRxiv*. 2020;  
754 doi:10.1101/2020.05.22.110833.
- 755 30. Lieberman-Aiden E, van Berkum NL, Williams L, Imakaev M, Ragoczy T, Telling A, et al.  
756 Comprehensive mapping of long-range interactions reveals folding principles of the human  
757 genome. *Science*. 2009;326 5950:289-93. doi:10.1126/science.1181369.
- 758 31. Szabo Q, Bantignies F and Cavalli G. Principles of genome folding into topologically  
759 associating domains. *Science Advances*. 2019;5 4:eaaw1668. doi:10.1126/sciadv.aaw1668.
- 760 32. Rao M, Morisson M, Faraut T, Bardes S, Fève K, Labarthe E, et al. A duck RH panel and its  
761 potential for assisting NGS genome assembly. *BMC Genomics*. 2012;13 1:513.  
762 doi:10.1186/1471-2164-13-513.
- 763 33. Skinner BM, Robertson LBW, Tempest HG, Langley EJ, Ioannou D, Fowler KE, et al.  
764 Comparative genomics in chicken and Pekin duck using FISH mapping and microarray  
765 analysis. *BMC Genomics*. 2009;10:357. doi:10.1186/1471-2164-10-357.
- 766 34. Claramunt S and Cracraft J. A new time tree reveals Earth history's imprint on the evolution  
767 of modern birds. *Science Advances*. 2015;1 11:e1501005. doi:10.1126/sciadv.1501005.

- 768 35. Herrera AM, Brennan PLR and Cohn MJ. Development of avian external genitalia:  
769 interspecific differences and sexual differentiation of the male and female phallus. *Sex Dev.*  
770 2015;9 1:43-52. doi:10.1159/000364927.
- 771 36. Huang Y, Li Y, Burt DW, Chen H, Zhang Y, Qian W, et al. The duck genome and  
772 transcriptome provide insight into an avian influenza virus reservoir species. *Nat Genet.*  
773 2013;45 7:776-83. doi:10.1038/ng.2657.
- 774 37. Nakamura D, Tiersch TR, Douglass M and Chandler RW. Rapid identification of sex in  
775 birds by flow cytometry. *Cytogenet Cell Genet.* 1990;53 4:201-5. doi:10.1159/000132930.
- 776 38. Tiersch TR and Wachtel SS. On the evolution of genome size of birds. *J Hered.* 1991;82  
777 5:363-8. doi:10.1093/oxfordjournals.jhered.a111105.
- 778 39. Takagi N and Makino S. A Revised Study on the Chromosomes of three Species of Birds.  
779 *Caryologia.* 1966;19 4:443-55. doi:10.1080/00087114.1966.10796235.
- 780 40. Lu L, Chen Y, Wang Z, Li X, Chen W, Tao Z, et al. The goose genome sequence leads to  
781 insights into the evolution of waterfowl and susceptibility to fatty liver. *Genome Biol.*  
782 2015;16:89. doi:10.1186/s13059-015-0652-y.
- 783 41. Warren WC, Hillier LW, Tomlinson C, Minx P, Kremitzki M, Graves T, et al. A New  
784 Chicken Genome Assembly Provides Insight into Avian Genome Structure. *G3.* 2017;7  
785 1:109-17. doi:10.1534/g3.116.035923.
- 786 42. Islam FB, Uno Y, Nunome M, Nishimura O, Tarui H, Agata K, et al. Comparison of the  
787 chromosome structures between the chicken and three anserid species, the domestic duck  
788 (*Anas platyrhynchos*), Muscovy duck (*Cairina moschata*), and Chinese goose (*Anser*  
789 *cygnoides*), and the delineation of their karyotype evolution by comparative chromosome  
790 mapping. *The Journal of Poultry Science.* 2013:0130090.
- 791 43. Peona V, Blom MPK, Xu L, Burri R, Sullivan S, Bunikis I, et al. Identifying the causes and  
792 consequences of assembly gaps using a multiplatform genome assembly of a bird-of-  
793 paradise. doi:10.1101/2019.12.19.882399.
- 794 44. Botero-Castro F, Figuet E, Tilak M-K, Nabholz B and Galtier N. Avian Genomes Revisited:  
795 Hidden Genes Uncovered and the Rates versus Traits Paradox in Birds. *Mol Biol Evol.*  
796 2017;34 12:3123-31. doi:10.1093/molbev/msx236.
- 797 45. Korlach J, Gedman G, Kingan SB, Chin C-S, Howard JT, Audet J-N, et al. De novo PacBio  
798 long-read and phased avian genome assemblies correct and add to reference genes generated  
799 with intermediate and short reads. *GigaScience.* 2017;6 10:gix085.
- 800 46. Zhou Z, Li M, Cheng H, Fan W, Yuan Z, Gao Q, et al. An intercross population study  
801 reveals genes associated with body size and plumage color in ducks. *Nat Commun.* 2018;9  
802 1:2648. doi:10.1038/s41467-018-04868-4.
- 803 47. Duret L and Galtier N. Biased gene conversion and the evolution of mammalian genomic  
804 landscapes. *Annu Rev Genomics Hum Genet.* 2009;10:285-311. doi:10.1146/annurev-  
805 genom-082908-150001.
- 806 48. International Chicken Genome Sequencing C. Sequence and comparative analysis of the  
807 chicken genome provide unique perspectives on vertebrate evolution. *Nature.* 2004;432  
808 7018:695-716. doi:10.1038/nature03154.
- 809 49. McQueen HA, McBride D, Miele G, Bird AP and Clinton M. Dosage compensation in  
810 birds. *Current Biology.* 2001;11 4:253-7. doi:10.1016/s0960-9822(01)00070-7.
- 811 50. Uno Y, Nishida C, Hata A, Ishishita S and Matsuda Y. Molecular cytogenetic  
812 characterization of repetitive sequences comprising centromeric heterochromatin in three  
813 Anseriformes species. *PLoS One.* 2019;14 3:e0214028. doi:10.1371/journal.pone.0214028.
- 814 51. Wójcik E and Smalec E. Description of the mallard duck (*Anas platyrhynchos*) karyotype.  
815 *Folia Biol.* 2007;55 3-4:115-20. doi:10.3409/173491607781492588.
- 816 52. Matzke MA, Varga F, Berger H, Scherthaner J, Schweizer D, Mayr B, et al. A 41–42 bp  
817 tandemly repeated sequence isolated from nuclear envelopes of chicken erythrocytes is

- 818 located predominantly on microchromosomes. *Chromosoma*. 1990;99 2:131-7.  
819 doi:10.1007/bf01735329.
- 820 53. Tanaka K, Suzuki T, Nojiri T, Yamagata T, Namikawa T and Matsuda Y. Characterization  
821 and chromosomal distribution of a novel satellite DNA sequence of Japanese quail  
822 (*Coturnix coturnix japonica*). *J Hered*. 2000;91 5:412-5. doi:10.1093/jhered/91.5.412.
- 823 54. Maslova A, Zlotina A, Kosyakova N, Sidorova M and Krasikova A. Three-dimensional  
824 architecture of tandem repeats in chicken interphase nucleus. *Chromosome Res*. 2015;23  
825 3:625-39. doi:10.1007/s10577-015-9485-5.
- 826 55. Zlotina A, Maslova A, Kosyakova N, Al-Rikabi ABH, Liehr T and Krasikova A.  
827 Heterochromatic regions in Japanese quail chromosomes: comprehensive molecular-  
828 cytogenetic characterization and 3D mapping in interphase nucleus. *Chromosome Res*.  
829 2019;27 3:253-70. doi:10.1007/s10577-018-9597-9.
- 830 56. Fishman V, Battulin N, Nuriddinov M, Maslova A, Zlotina A, Strunov A, et al. 3D  
831 organization of chicken genome demonstrates evolutionary conservation of topologically  
832 associated domains and highlights unique architecture of erythrocytes' chromatin. *Nucleic  
833 Acids Res*. 2019;47 2:648-65. doi:10.1093/nar/gky1103.
- 834 57. Schield DR, Card DC, Hales NR, Perry BW, Pasquesi GM, Blackmon H, et al. The origins  
835 and evolution of chromosomes, dosage compensation, and mechanisms underlying venom  
836 regulation in snakes. *Genome Res*. 2019;29 4:590-601. doi:10.1101/gr.240952.118.
- 837 58. Hooper DM and Price TD. Chromosomal inversion differences correlate with range overlap  
838 in passerine birds. *Nat Ecol Evol*. 2017;1 10:1526-34. doi:10.1038/s41559-017-0284-6.
- 839 59. Knief U, Hemmrich-Stanisak G, Wittig M, Franke A, Griffith SC, Kempnaers B, et al.  
840 Fitness consequences of polymorphic inversions in the zebra finch genome. *Genome Biol*.  
841 2016;17 1:199. doi:10.1186/s13059-016-1056-3.
- 842 60. Craig RJ, Suh A, Wang M and Ellegren H. Natural selection beyond genes: Identification  
843 and analyses of evolutionarily conserved elements in the genome of the collared flycatcher  
844 (*Ficedula albicollis*). *Mol Ecol*. 2018;27 2:476-92. doi:10.1111/mec.14462.
- 845 61. Ma J, Zhang L, Suh BB, Raney BJ, Burhans RC, Kent WJ, et al. Reconstructing contiguous  
846 regions of an ancestral genome. *Genome Res*. 2006;16 12:1557-65. doi:10.1101/gr.5383506.
- 847 62. Damas J, O'Connor R, Farré M, Lenis VPE, Martell HJ, Mandawala A, et al. Upgrading  
848 short-read animal genome assemblies to chromosome level using comparative genomics and  
849 a universal probe set. *Genome Research*. 2017;27 5:875-84. doi:10.1101/gr.213660.116.
- 850 63. Groenen MAM, Archibald AL, Uenishi H, Tuggle CK, Takeuchi Y, Rothschild MF, et al.  
851 Analyses of pig genomes provide insight into porcine demography and evolution. *Nature*.  
852 2012;491 7424:393-8. doi:10.1038/nature11622.
- 853 64. Kirkpatrick M. How and why chromosome inversions evolve. *PLoS Biol*. 2010;8 9  
854 doi:10.1371/journal.pbio.1000501.
- 855 65. Evseev D and Magor KE. Innate Immune Responses to Avian Influenza Viruses in Ducks  
856 and Chickens. *Vet Sci China*. 2019;6 1 doi:10.3390/vetsci6010005.
- 857 66. Dixon JR, Selvaraj S, Yue F, Kim A, Li Y, Shen Y, et al. Topological domains in  
858 mammalian genomes identified by analysis of chromatin interactions. *Nature*. 2012;485  
859 7398:376-80. doi:10.1038/nature11082.
- 860 67. Mirny LA, Imakaev M and Abdennur N. Two major mechanisms of chromosome  
861 organization. *Curr Opin Cell Biol*. 2019;58:142-52. doi:10.1016/j.ceb.2019.05.001.
- 862 68. Falk M, Feodorova Y, Naumova N, Imakaev M, Lajoie BR, Leonhardt H, et al.  
863 Heterochromatin drives compartmentalization of inverted and conventional nuclei. *Nature*.  
864 2019;570 7761:395-9. doi:10.1038/s41586-019-1275-3.
- 865 69. Busslinger GA, Stocsits RR, van der Lelij P, Axelsson E, Tedeschi A, Galjart N, et al.  
866 Cohesin is positioned in mammalian genomes by transcription, CTCF and Wapl. *Nature*.  
867 2017;544 7651:503-7. doi:10.1038/nature22063.

- 868 70. Zhang Y, Li T, Preissl S, Amaral ML, Grinstein JD, Farah EN, et al. Transcriptionally active  
869 HERV-H retrotransposons demarcate topologically associating domains in human  
870 pluripotent stem cells. *Nature Genetics*. 2019;51 9:1380-8. doi:10.1038/s41588-019-0479-7.
- 871 71. Ibrahim DM and Mundlos S. Three-dimensional chromatin in disease: What holds us  
872 together and what drives us apart? *Curr Opin Cell Biol*. 2020;64:1-9.  
873 doi:10.1016/j.ceb.2020.01.003.
- 874 72. Harmston N, Ing-Simmons E, Tan G, Perry M, Merkenschlager M and Lenhard B.  
875 Topologically associating domains are ancient features that coincide with Metazoan clusters  
876 of extreme noncoding conservation. *Nat Commun*. 2017;8 1:441. doi:10.1038/s41467-017-  
877 00524-5.
- 878 73. Canela A, Maman Y, Jung S, Wong N, Callen E, Day A, et al. Genome Organization Drives  
879 Chromosome Fragility. *Cell*. 2017;170 3:507-21.e18. doi:10.1016/j.cell.2017.06.034.
- 880 74. Rutkowska J, Lagisz M and Nakagawa S. The long and the short of avian W chromosomes:  
881 no evidence for gradual W shortening. *Biology Letters*. 2012;8 4:636-8.  
882 doi:10.1098/rsbl.2012.0083.
- 883 75. Hammar BO. THE KARYOTYPES OF NINE BIRDS. *Hereditas*. 2009;55 2-3:367-85.  
884 doi:10.1111/j.1601-5223.1966.tb02056.x.
- 885 76. Schneider V and Church D. Genome reference consortium. The NCBI Handbook [Internet]  
886 2nd edition. National Center for Biotechnology Information (US); 2013.
- 887 77. Solari AJ and Pigozzi MI. Recombination nodules and axial equalization in the ZW pairs of  
888 the Peking duck and the guinea fowl. *Cytogenet Cell Genet*. 1993;64 3-4:268-72.  
889 doi:10.1159/000133591.
- 890 78. Xu L, Auer G, Peona V, Suh A, Deng Y, Feng S, et al. Dynamic evolutionary history and  
891 gene content of sex chromosomes across diverse songbirds. *Nat Ecol Evol*. 2019;3 5:834-44.  
892 doi:10.1038/s41559-019-0850-1.
- 893 79. Suh A, Paus M, Kieffmann M, Churakov G, Franke FA, Brosius J, et al. Mesozoic  
894 retrotransposons reveal parrots as the closest living relatives of passerine birds. *Nat Commun*.  
895 2011;2:443. doi:10.1038/ncomms1448.
- 896 80. Ryba T, Hiratani I, Lu J, Itoh M, Kulik M, Zhang J, et al. Evolutionarily conserved  
897 replication timing profiles predict long-range chromatin interactions and distinguish closely  
898 related cell types. *Genome Res*. 2010;20 6:761-70. doi:10.1101/gr.099655.109.
- 899 81. Pope BD, Ryba T, Dileep V, Yue F, Wu W, Denas O, et al. Topologically associating  
900 domains are stable units of replication-timing regulation. *Nature*. 2014;515 7527:402-5.  
901 doi:10.1038/nature13986.
- 902 82. Murphy WJ, Larkin DM, Everts-van der Wind A, Bourque G, Tesler G, Auvil L, et al.  
903 Dynamics of mammalian chromosome evolution inferred from multispecies comparative  
904 maps. *Science*. 2005;309 5734:613-7. doi:10.1126/science.1111387.
- 905 83. Malcolm S and Abu-Amero S. Faculty Opinions recommendation of Strict evolutionary  
906 conservation followed rapid gene loss on human and rhesus Y chromosomes. *Faculty*  
907 *Opinions – Post-Publication Peer Review of the Biomedical Literature*. 2012;  
908 doi:10.3410/f.14079956.15778060.
- 909 84. Hughes JF, Skaletsky H, Brown LG, Pyntikova T, Graves T, Fulton RS, et al. Strict  
910 evolutionary conservation followed rapid gene loss on human and rhesus Y chromosomes.  
911 *Nature*. 2012;483 7387:82-6. doi:10.1038/nature10843.
- 912 85. Rozen S, Skaletsky H, Marszalek JD, Minx PJ, Cordum HS, Waterston RH, et al. Abundant  
913 gene conversion between arms of palindromes in human and ape Y chromosomes. *Nature*.  
914 2003;423 6942:873-6. doi:10.1038/nature01723.
- 915 86. Mahajan S, C. Wei KH, Nalley MJ, Gibilisco L and Bachtrog D. De novo assembly of a  
916 young *Drosophila* Y chromosome using single-molecule sequencing and chromatin  
917 conformation capture. *PLOS Biology*. 2018;16 7:e2006348.  
918 doi:10.1371/journal.pbio.2006348.

- 919 87. Pendleton M, Sebra R, Pang AWC, Ummat A, Franzen O, Rausch T, et al. Assembly and  
920 diploid architecture of an individual human genome via single-molecule technologies. *Nat*  
921 *Methods*. 2015;12 8:780-6. doi:10.1038/nmeth.3454.
- 922 88. Bickhart DM, Rosen BD, Koren S, Sayre BL, Hastie AR, Chan S, et al. Single-molecule  
923 sequencing and chromatin conformation capture enable de novo reference assembly of the  
924 domestic goat genome. *Nat Genet*. 2017;49 4:643-50. doi:10.1038/ng.3802.
- 925 89. Chin C-S, Peluso P, Sedlazeck FJ, Nattestad M, Concepcion GT, Clum A, et al. Phased  
926 diploid genome assembly with single-molecule real-time sequencing. *Nat Methods*. 2016;13  
927 12:1050-4. doi:10.1038/nmeth.4035.
- 928 90. Melissa LS, Delany N, Hepler. N L, Alexander D, Katzenstein D, Brown M, et al. An  
929 improved circular consensus algorithm with an application to detect HIV-1 Drug Resistance  
930 Associated Mutations (DRAMs). 2016.
- 931 91. Roach MJ, Schmidt SA and Borneman AR. Purge Haplotigs: allelic contig reassignment for  
932 third-gen diploid genome assemblies. *BMC Bioinformatics*. 2018;19 1:460.  
933 doi:10.1186/s12859-018-2485-7.
- 934 92. Yuan Y, Bayer PE, Lee H-T and Edwards D. runBNG: a software package for BioNano  
935 genomic analysis on the command line. *Bioinformatics*. 2017;33 19:3107-9.  
936 doi:10.1093/bioinformatics/btx366.
- 937 93. Ghurye J, Rhie A, Walenz BP, Schmitt A, Selvaraj S, Pop M, et al. Integrating Hi-C links  
938 with assembly graphs for chromosome-scale assembly. *PLoS Comput Biol*. 2019;15  
939 8:e1007273. doi:10.1371/journal.pcbi.1007273.
- 940 94. English AC, Richards S, Han Y, Wang M, Vee V, Qu J, et al. Mind the gap: upgrading  
941 genomes with Pacific Biosciences RS long-read sequencing technology. *PLoS One*. 2012;7  
942 11:e47768. doi:10.1371/journal.pone.0047768.
- 943 95. Walker BJ, Abeel T, Shea T, Priest M, Abouelliel A, Sakthikumar S, et al. Pilon: an  
944 integrated tool for comprehensive microbial variant detection and genome assembly  
945 improvement. *PLoS One*. 2014;9 11:e112963. doi:10.1371/journal.pone.0112963.
- 946 96. Waterhouse RM, Seppey M, Simão FA, Manni M, Ioannidis P, Klioutchnikov G, et al.  
947 BUSCO Applications from Quality Assessments to Gene Prediction and Phylogenomics.  
948 *Mol Biol Evol*. 2018;35 3:543-8. doi:10.1093/molbev/msx319.
- 949 97. Aken BL, Achuthan P, Akanni W, Amode MR, Bernsdorff F, Bhai J, et al. Ensembl 2017.  
950 *Nucleic Acids Res*. 2017;45 D1:D635-D42. doi:10.1093/nar/gkw1104.
- 951 98. Altschul SF, Gish W, Miller W, Myers EW and Lipman DJ. Basic local alignment search  
952 tool. *J Mol Biol*. 1990;215 3:403-10.
- 953 99. Birney E, Clamp M and Durbin R. GeneWise and Genomewise. *Genome Res*. 2004;14  
954 5:988-95. doi:10.1101/gr.1865504.
- 955 100. Stanke M, Schöffmann O, Morgenstern B and Waack S. Gene prediction in eukaryotes with  
956 a generalized hidden Markov model that uses hints from external sources. *BMC*  
957 *Bioinformatics*. 2006;7:62. doi:10.1186/1471-2105-7-62.
- 958 101. Grabherr MG, Haas BJ, Yassour M, Levin JZ, Thompson DA, Amit I, et al. Full-length  
959 transcriptome assembly from RNA-Seq data without a reference genome. *Nature*  
960 *Biotechnology*. 2011;29 7:644-52. doi:10.1038/nbt.1883.
- 961 102. Haas BJ, Salzberg SL, Zhu W, Pertea M, Allen JE, Orvis J, et al. Automated eukaryotic  
962 gene structure annotation using EVIDENCEModeler and the Program to Assemble Spliced  
963 Alignments. *Genome Biol*. 2008;9 1:R7. doi:10.1186/gb-2008-9-1-r7.
- 964 103. Tarailo-Graovac M and Chen N. Using RepeatMasker to identify repetitive elements in  
965 genomic sequences. *Curr Protoc Bioinformatics*. 2009;Chapter 4:Unit 4.10.  
966 doi:10.1002/0471250953.bi0410s25.
- 967 104. Bao W, Kojima KK and Kohany O. Repbase Update, a database of repetitive elements in  
968 eukaryotic genomes. *Mobile DNA*. 2015;6 1 doi:10.1186/s13100-015-0041-9.

- 969 105. Benson G. Tandem repeats finder: a program to analyze DNA sequences. *Nucleic Acids*  
970 *Research*. 1999;27 2:573-80. doi:10.1093/nar/27.2.573.
- 971 106. Meyne J, Ratliff RL and Moyzis RK. Conservation of the human telomere sequence  
972 (TTAGGG)<sub>n</sub> among vertebrates. *Proc Natl Acad Sci U S A*. 1989;86 18:7049-53.  
973 doi:10.1073/pnas.86.18.7049.
- 974 107. Kurtz S, Phillippy A, Delcher AL, Smoot M, Shumway M, Antonescu C, et al. Versatile and  
975 open software for comparing large genomes. *Genome Biol*. 2004;5 2:R12. doi:10.1186/gb-  
976 2004-5-2-r12.
- 977 108. Li H and Durbin R. Fast and accurate short read alignment with Burrows-Wheeler  
978 transform. *Bioinformatics*. 2009;25 14:1754-60. doi:10.1093/bioinformatics/btp324.
- 979 109. Li H. A statistical framework for SNP calling, mutation discovery, association mapping and  
980 population genetical parameter estimation from sequencing data. *Bioinformatics*. 2011;27  
981 21:2987-93. doi:10.1093/bioinformatics/btr509.
- 982 110. Alonge M, Soyk S, Ramakrishnan S, Wang X, Goodwin S, Sedlazeck FJ, et al. RaGOO: fast  
983 and accurate reference-guided scaffolding of draft genomes. *Genome Biol*. 2019;20 1:224.  
984 doi:10.1186/s13059-019-1829-6.
- 985 111. Servant N, Varoquaux N, Lajoie BR, Viara E, Chen C-J, Vert J-P, et al. HiC-Pro: an  
986 optimized and flexible pipeline for Hi-C data processing. *Genome Biol*. 2015;16:259.  
987 doi:10.1186/s13059-015-0831-x.
- 988 112. Foissac S, Djebali S, Munyard K, Vialaneix N, Rau A, Muret K, et al. Transcriptome and  
989 chromatin structure annotation of liver, CD4 and CD8 T cells from four livestock species.  
990 doi:10.1101/316091.
- 991 113. Ramírez F, Bhardwaj V, Arrigoni L, Lam KC, Grüning BA, Villaveces J, et al. High-  
992 resolution TADs reveal DNA sequences underlying genome organization in flies. *Nature*  
993 *Communications*. 2018;9 1 doi:10.1038/s41467-017-02525-w.
- 994 114. Jolma A, Yan J, Whittington T, Toivonen J, Nitta KR, Rastas P, et al. DNA-binding  
995 specificities of human transcription factors. *Cell*. 2013;152 1-2:327-39.
- 996 115. Bailey TL, Elkan C, University of California SDDoCS and Engineering. Fitting a mixture  
997 model by expectation maximization to discover motifs in bipolymers. 1994.
- 998 116. Servant N, Lajoie BR, Nora EP, Giorgetti L, Chen C-J, Heard E, et al. HiTC: exploration of  
999 high-throughput 'C' experiments. *Bioinformatics*. 2012;28 21:2843-4.  
1000 doi:10.1093/bioinformatics/bts521.
- 1001 117. Ardakany AR, Gezer HT, Lonardi S and Ay F. Mustache: Multi-scale Detection of  
1002 Chromatin Loops from Hi-C and Micro-C Maps using Scale-Space Representation. *bioRxiv*.  
1003 2020.
- 1004 118. Harris RS. Improved pairwise Alignment of genomic DNA. 2007.
- 1005 119. Kim D, Langmead B and Salzberg SL. HISAT: a fast spliced aligner with low memory  
1006 requirements. *Nat Methods*. 2015;12 4:357-60. doi:10.1038/nmeth.3317.
- 1007 120. Love MI, Huber W and Anders S. Moderated estimation of fold change and dispersion for  
1008 RNA-seq data with DESeq2. *Genome Biol*. 2014;15 12:550. doi:10.1186/s13059-014-0550-  
1009 8.
- 1010 121. Yanai I, Benjamin H, Shmoish M, Chalifa-Caspi V, Shklar M, Ophir R, et al. Genome-wide  
1011 midrange transcription profiles reveal expression level relationships in human tissue  
1012 specification. *Bioinformatics*. 2005;21 5:650-9. doi:10.1093/bioinformatics/bti042.
- 1013 122. Kryuchkova-Mostacci N and Robinson-Rechavi M. A benchmark of gene expression tissue-  
1014 specificity metrics. *Brief Bioinform*. 2017;18 2:205-14. doi:10.1093/bib/bbw008.
- 1015 123. Yang WR, Ardeljan D, Pacyna CN, Payer LM and Burns KH. SQUIRE reveals locus-  
1016 specific regulation of interspersed repeat expression. *Nucleic Acids Res*. 2019;47 5:e27.  
1017 doi:10.1093/nar/gky1301.
- 1018
